# Supplementary material for: Synthesis of a core/satellite-like multifunctional nanocarrier for pH- and NIR-triggered intracellular chemothermal therapy and tumor imaging
Source: Royal Society of Chemistry journal article supplement (doi:10.1039/c6ra27802g), 2017-01-01
Supplement: c6ra27802g1.pdf [file c6ra27802g1.pdf]

## Supporting Information

### **Synthesis of core/satellite-like multifunctional nanocarrier for pH- and NIR-triggered intracellular chemothermal therapy and tumor imaging**

Xue Yang,<sup>†</sup> Jun Xiong,<sup>†</sup> Pengchao Qiu, Mian Chen, Dinggeng He, Xiaoxiao He,<sup>\*</sup> Kemin Wang,<sup>\*</sup>

Jinlu Tang

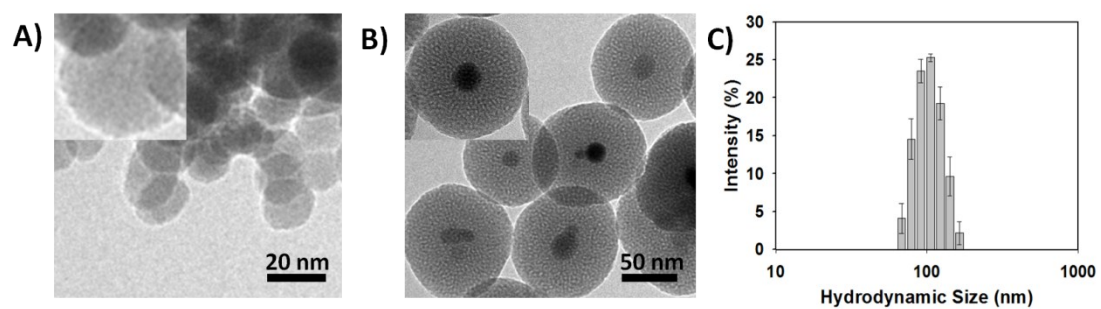

**Fig. S1** TEM images of UCNP A) and UCNP@mSiO<sub>2</sub> B), and hydrodynamic size of UCNP@mSiO<sub>2</sub> C).

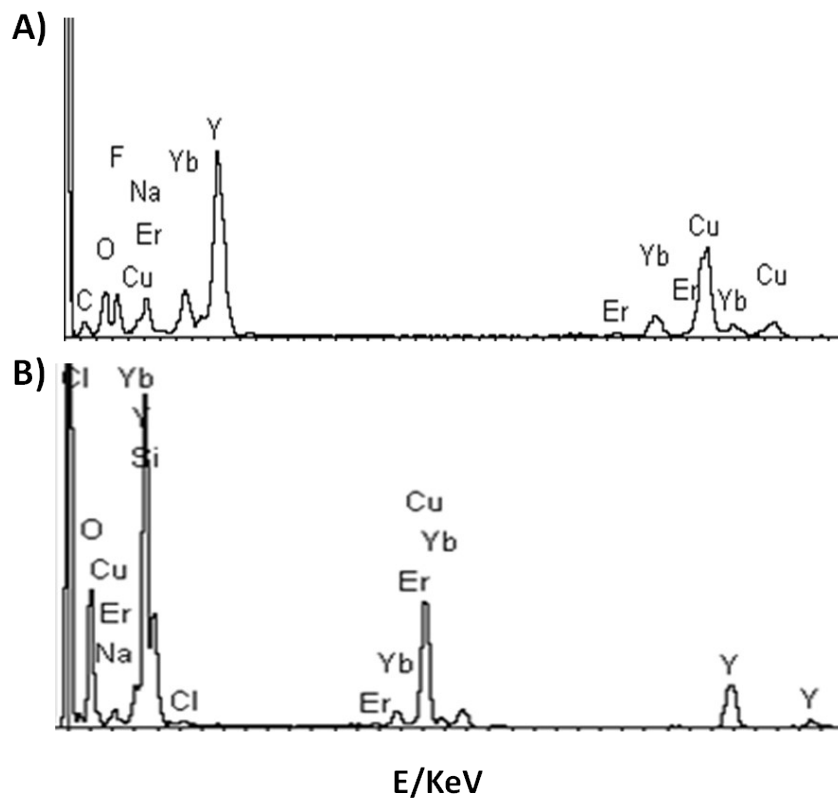

**Fig. S2** TEM-associated EDX spectra of UCNP A), and UCNP@mSiO<sub>2</sub> B).

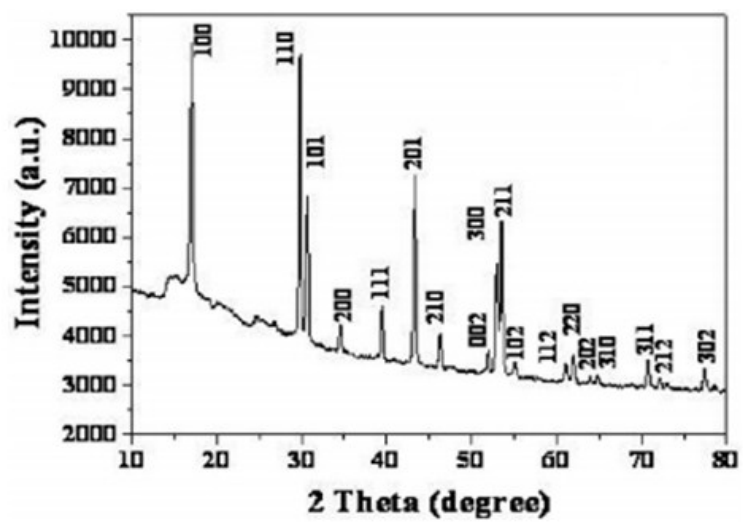

Fig. S3 Powder X-ray pattern of UCNP@mSiO<sub>2</sub>.

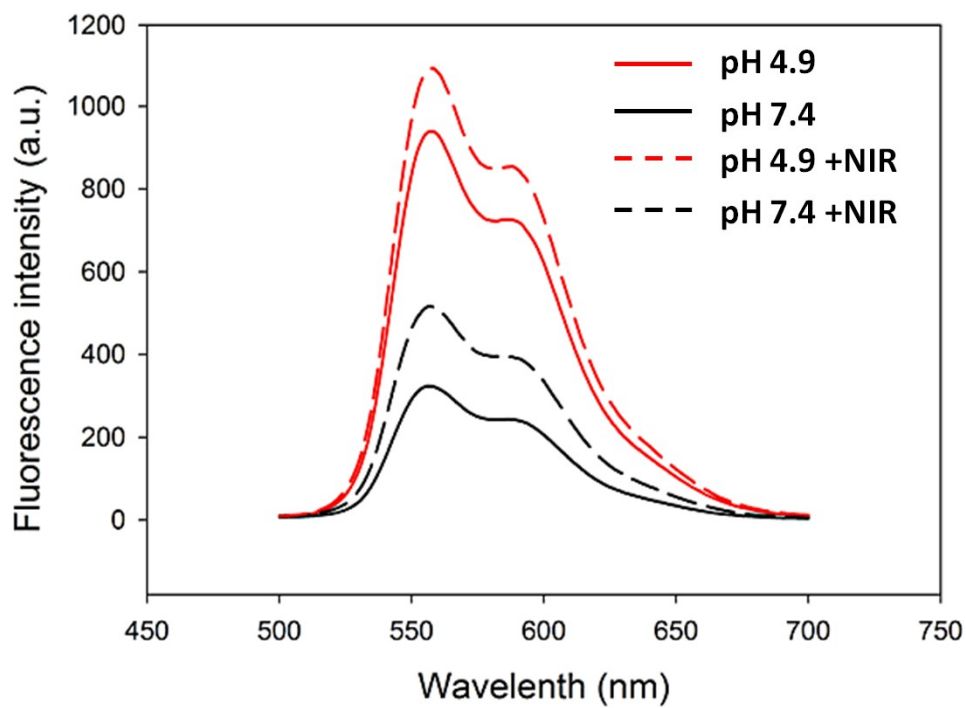

**Fig. S4** Fluorescence spectra of released DOX from DOX@USNP@mSiO<sub>2</sub>-AuNRs under different conditions.

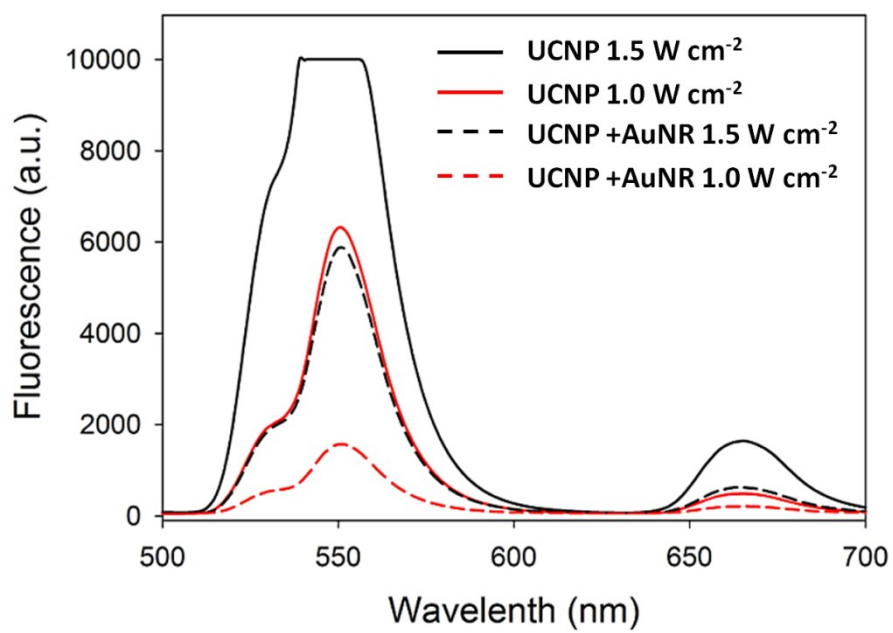

**Fig. S5** The effect of AuNRs on the fluorescence spectra of UCNPs under different laser irradiation ( $E_x = 980$  nm).

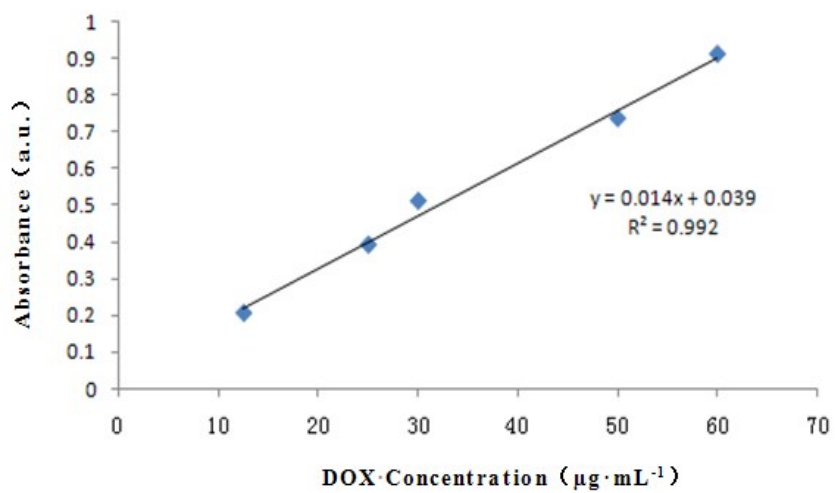

**Fig. S6** Standard curve of DOX

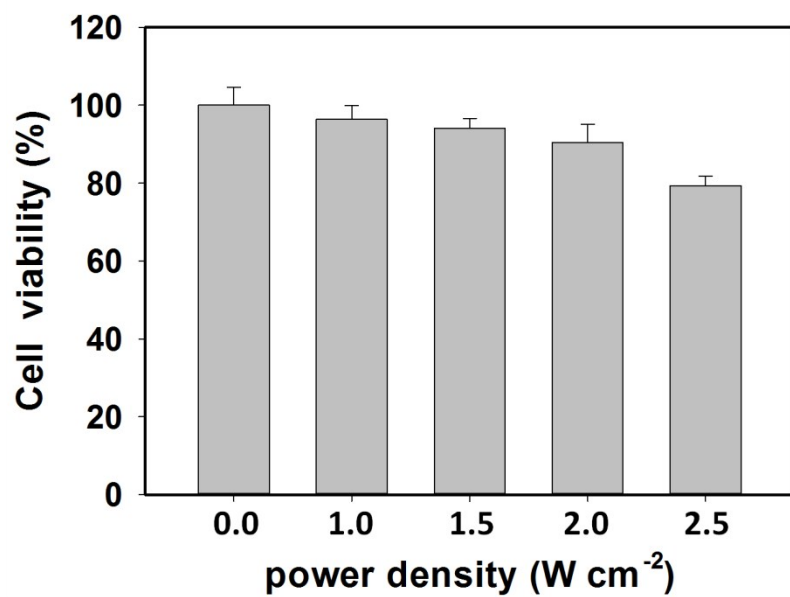

**Fig. S7** The effect of NIR on the cell viability of SMCC-7721 cells under different power density.



**Table S1.** Related parameters of UCNP@mSiO<sub>2</sub>

| sample                 | BET surface area<br>S <sub>BET</sub> (m <sup>2</sup> g <sup>-1</sup> ) | BJH pore volume<br>V <sub>P</sub> (cm <sup>3</sup> g <sup>-1</sup> ) | BJH pore diameter<br>D <sub>p</sub> (nm) |
|------------------------|------------------------------------------------------------------------|----------------------------------------------------------------------|------------------------------------------|
| UCNP@mSiO <sub>2</sub> | 211.3                                                                  | 0.236                                                                | 4.2                                      |

**Table S2.** Hydrodynamic size and corresponding PDI of different nanoparticles

| sample | UCNP  | UCNP@mSiO <sub>2</sub> | AuNR                                              |
|--------|-------|------------------------|---------------------------------------------------|
| Size   | 23 nm | 120 nm                 | Length: 21 nm<br>Width: 7 nm<br>aspect ratio: 3.0 |
| PDI    | 0.082 | 0.137                  | 0.096                                             |
